# Supplementary material for: Magnetism of N-doped graphene nanoribbons with zigzag edges from bottom-up fabrication
Source: Royal Society of Chemistry journal article supplement (doi:10.1039/c5ra26075b), 2016-01-01
Supplement: c5ra26075b1.pdf [file c5ra26075b1.pdf]

## Supporting Information

### **Magnetism of N-Doped Graphene Nanoribbon with Zigzag Edges from Bottom-up Fabrication**

Jie Xu,<sup>a,b,†</sup> Weifeng Zhang,<sup>a,†</sup> Congyuan Wei,<sup>a</sup> Jianyao Huang,<sup>a</sup> Zupan Mao,<sup>a</sup> Gui Yu<sup>a\*</sup>

<sup>a</sup> Beijing National Laboratory for Molecular Sciences, Institute of Chemistry, Chinese Academy of Sciences, Beijing 100190, P. R. China.

Email: yugui@iccas.ac.cn

<sup>b</sup> University of Chinese Academy of Sciences, Beijing 100049, P. R. China.

Section 1. Synthesis materials

Section 2. Photographic image

Section 3. Scanning Electron Microscopy

Section 4. Atomic Force Microscopy

Section 5. Raman spectrum

Section 6. Infrared spectroscopy

Section 7. XPS Spectral Profiles

Section 8. Inductively Coupled Plasma

## Section 1.

Synthesis of 2,3,6,7-tetraaminophenazine hydrochloride.<sup>1</sup>

0.107 g (0.189 mmol) of 1,2,4,5-tetraaminobenzene tetrahydrochloride, 0.215 g (2.62 mmol) of anhydrous sodium acetate and 5 mL of distilled water were added into a three-necked flask placed a reflux condense and bubbled compressed air. Then the processes were refluxed for overnight. Finally, we collected and dried to obtain the dark brownish black precipitate in quantitative yield.

Synthesis of 2,7-di-*tert*-butyl-4,5,9,10-tetraketopyrene

This process is based on the literature.<sup>2</sup>

## Section 2. Photographic image

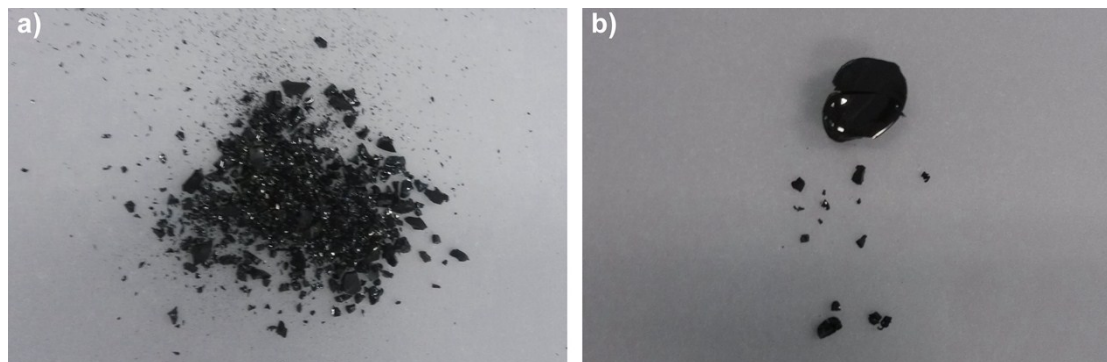

**Fig. S1** Photographic images of the powder of a) TAB and b) TAP.

### Section 3. Scanning Electron Microscopy

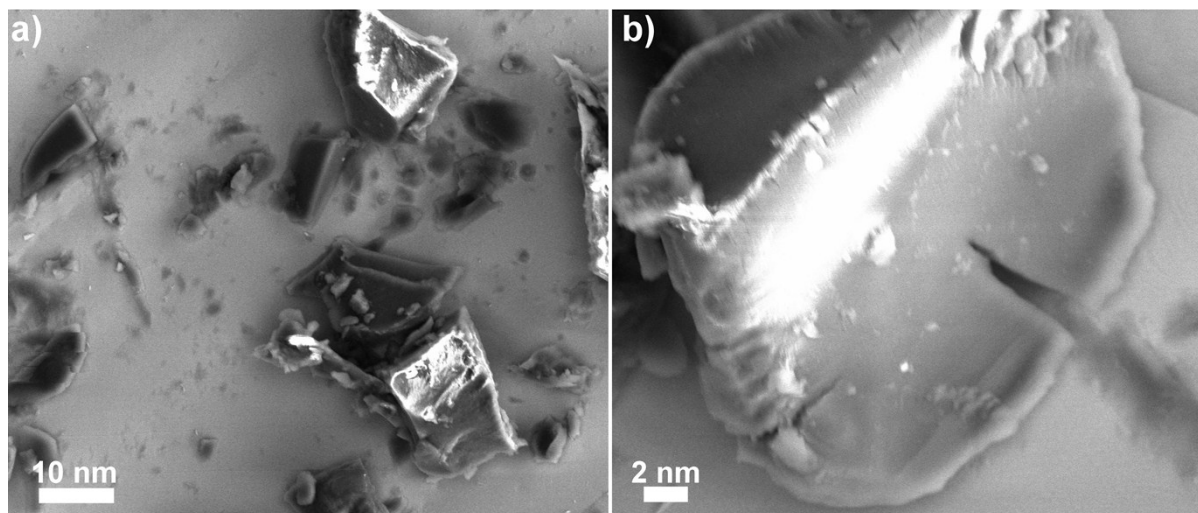

**Fig. S2** SEM images of TAB sample.

The morphology and microstructures of TAB sample were further confirmed by FE-SEM. The TAB exhibited distinct 2D sheet geometry, which is similar to the graphene nanosheets.

### Section 4. Atomic Force Microscopy

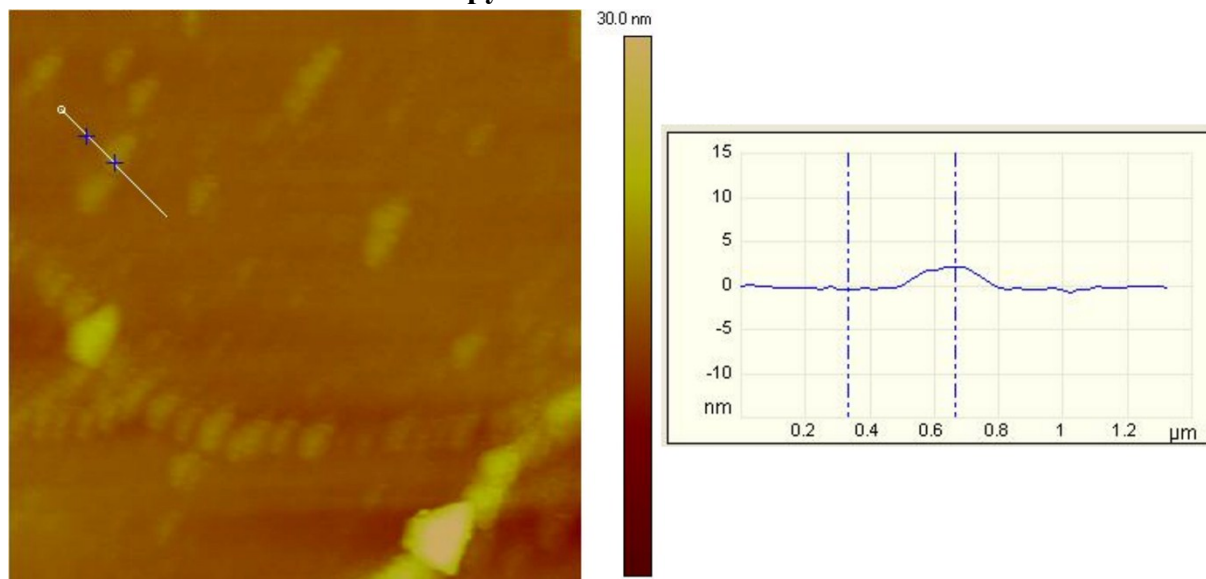

**Fig. S3** Typical AFM of TAB sheets.

AFM was used to further study the materials morphology by preparing sample from severe ultrasonic dispersion in isopropanol. TABs showed typical 2D nanosheet

geometry and similar grapheme-based materials. But the TABs sheet size showed from AFM was smaller than SEM due to vigorous ultrasonic dispersion.

## Section 5. Raman spectrum

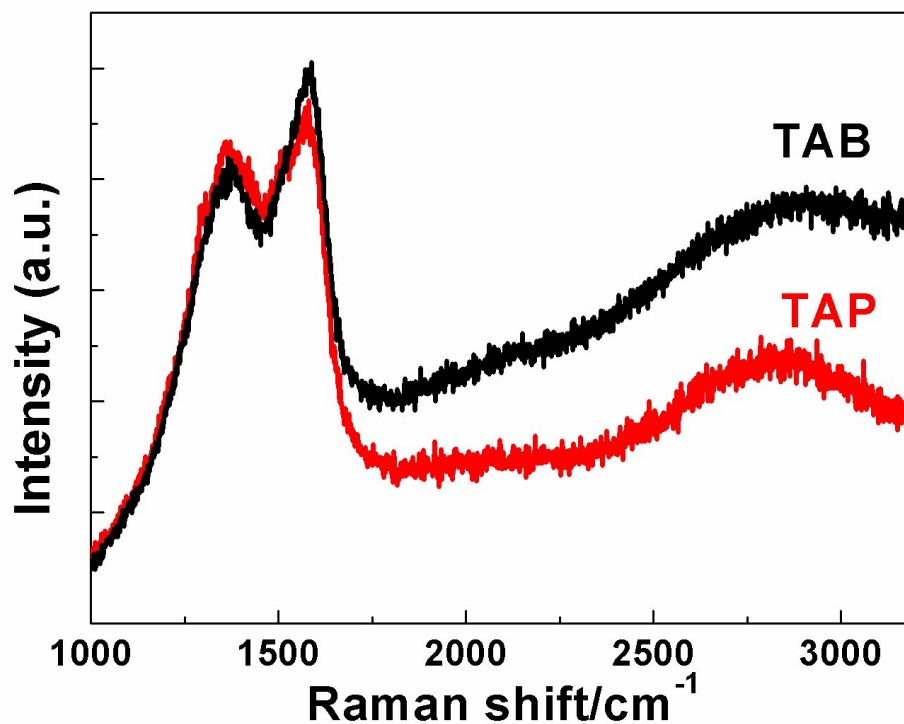

**Fig. S4** Raman spectrum of TAB and TAP.

For further identifying carbon materials, Raman spectroscopy was often used to as a powerful tool. The typical Raman spectra of TABs and TAP were shown in Figure S4, which reveals the appearance of a characteristic disorder-induced peak (D peak) at 1387 cm<sup>-1</sup> and G peak at 1530 cm<sup>-1</sup>. Another important characteristic feature is the 2D band which revealed at round 2700 cm<sup>-1</sup> and was weak, and was similar reported N-doped graphene.<sup>3</sup>

## Section 6. Infrared spectroscopy

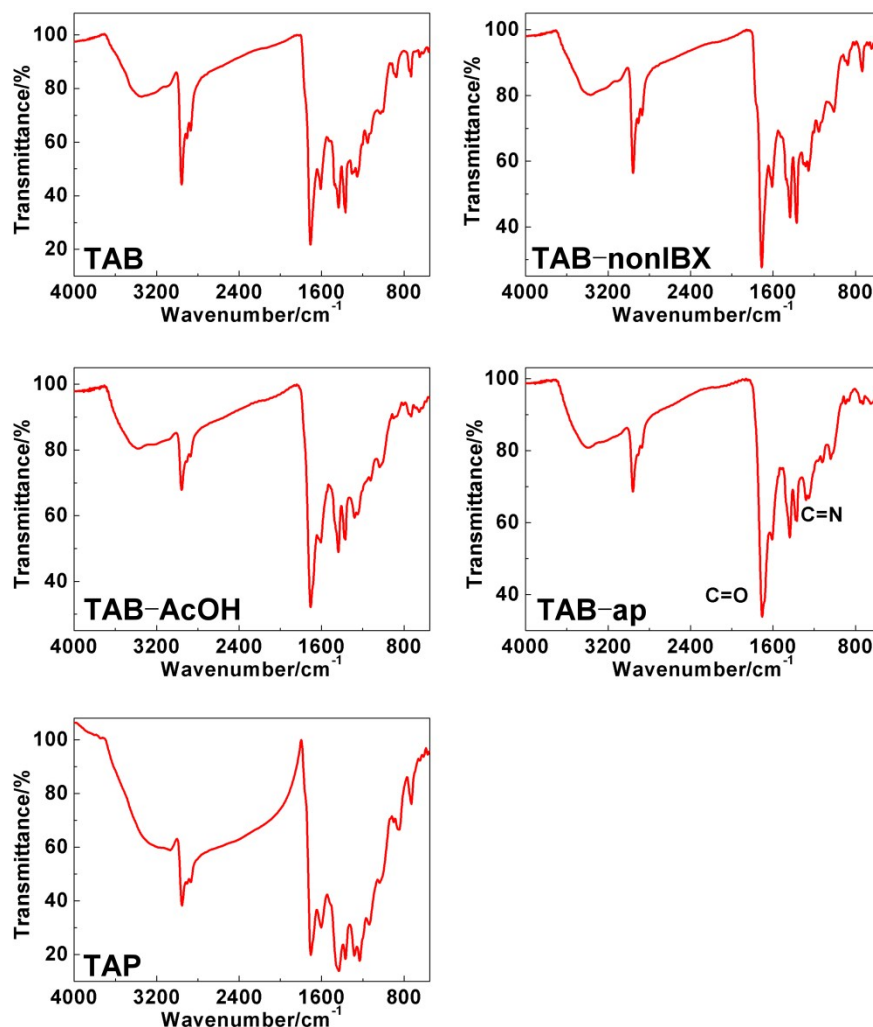

**Fig. S5** Infrared spectroscopy of TAB, TAP, TAB-AcOH, TAP-nonIBX, and TAB-ap.

The peaks of 1706 cm<sup>-1</sup> is due to carbonyl group which is the same to the 2,7-di-*tert*-butyl-4,5,9,10-tetraketopyrene. In Figure S4, the peaks at 1605 cm<sup>-1</sup> is assigned to aromatic ring C=C stretching from phenyl rings, and ones at 1475 cm<sup>-1</sup> correspond to aromatic C-C stretching from aza rings. However, the peaks respected to imine C-C=N-C stretching from aza rings is different between TAP and TAB. The peaks of TAP imine is at 1230 cm<sup>-1</sup>, but TAB imine is at 1253 cm<sup>-1</sup>.

## Section 7. XPS Spectral Profiles

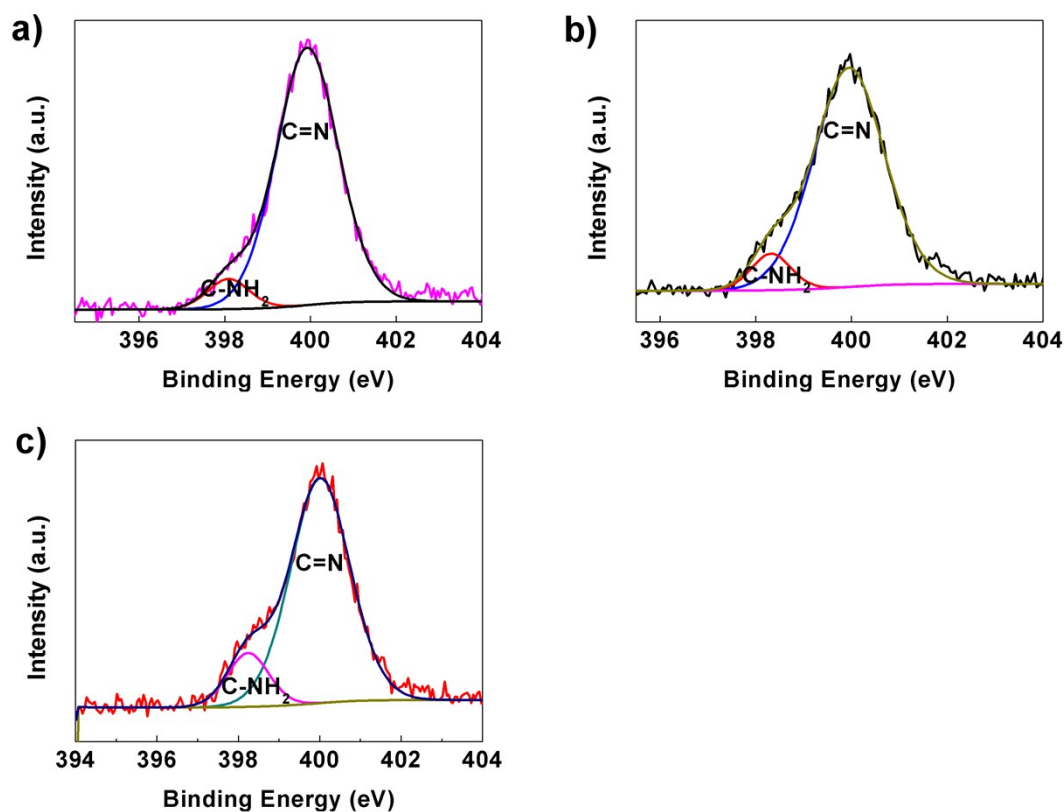

**Fig. S6** N1s XPS spectra of a) TAP-nonIBX, b) TAB-AcOH, and c) TAB-ap.

## Section 8. Inductively Coupled Plasma

**Table S1** Trace Analysis of impurities of three samples measured by the inductively coupled plasma spectrometry. The unit is ppm. (without ruling out the impurities from plastic wrap)

| Sample     | Bi | Co   | Cr    | Fe   | Hg | Mn   | Pt | Ni   | Cu    |
|------------|----|------|-------|------|----|------|----|------|-------|
| TAB        | 0  | 0    | 4.54  | 4.3  | 0  | 0.06 | 0  | 0    | <0.01 |
| TAB-nonIBX | 0  | 0    | 5.3   | 3.20 | 0  | 0.81 | 0  | 2.00 | 6.21  |
| TAP        | 0  | 0    | 5.75  | 3.77 | 0  | 0.85 | 0  | 0.44 | 6.61  |
| TAB-AcOH   | 0  | 3.96 | 11.44 | 3.59 | 0  | 0.6  | 0  | 0    | <0.01 |
| TAB-ap     | 0  | 0    | 4.82  | 4.92 | 0  | 0.68 | 0  | 0.20 | 6.09  |

### References:

- 1 H. M. Gajiwala, R. Zand, *Polymer*, 2000, **41**, 2009.

- 2 J. Hu, D. Zhang, F. W. Harris, *J. Org. Chem.*, 2005, **70**, 707.
- 3 Y. F. Lu, S. T. Lo, J. C. Lin, W. Zhang, J. Y. Lu, F. H. Liu, C. M. Tseng, Y. H. Lee, C. T. Liang, L. J. Li, *ACS Nano* 2013, **7**, 6522.
